# Supplementary material for: The perils of premature phenotyping in COVID-19: a call for caution
Source: PubMed Central journal article supplement — Eur Respir J. 2020 Jul 23;56(1):2001768. doi: 10.1183/13993003.01768-2020 (PMC7263061; doi:10.1183/13993003.01768-2020), 2020-07-23
Supplement: ERJ-01768-2020.Shareable.pdf [file ERJ-01768-2020.Shareable.pdf]

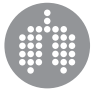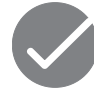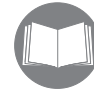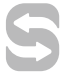

SHAREABLE PDF

# The perils of premature phenotyping in COVID-19: a call for caution

Lieuwe D.J. Bos <sup>1,2</sup>, Pratik Sinha<sup>3,4</sup> and Robert P. Dickson <sup>5,6,7</sup>

**Affiliations:** <sup>1</sup>Intensive Care, Amsterdam University Medical Centers, location AMC, University of Amsterdam, Infection and Immunity, Amsterdam, The Netherlands. <sup>2</sup>Dept of Respiratory Medicine, Amsterdam University Medical Centers, location AMC, University of Amsterdam, Infection and Immunity, Amsterdam, The Netherlands. <sup>3</sup>Dept of Medicine, University of California, San Francisco San Francisco, CA, USA. <sup>4</sup>Dept of Anesthesia, University of California, San Francisco San Francisco, CA, USA. <sup>5</sup>Division of Pulmonary and Critical Care Medicine, Dept of Internal Medicine, University of Michigan Medical School, Ann Arbor, MI, USA. <sup>6</sup>Department of Microbiology and Immunology, University of Michigan Medical School, Ann Arbor, MI, USA. <sup>7</sup>Michigan Center for Integrative Research in Critical Care, Ann Arbor, MI, USA.

**Correspondence:** Lieuwe D.J. Bos, Intensive Care, Amsterdam University Medical Centers, location AMC, University of Amsterdam, Infection and Immunity, Meibergdreef 9, M0-127 Amsterdam, 1105AZ, The Netherlands. l.d.bos@amsterdamumc.nl

@ERSpublications

**By prematurely phenotyping patients with COVID-19, we and our patients are exposed to considerable and preventable risk. If data-driven phenotypes are not insisted upon, our cognitive biases guarantee that we'll end up with phenotype-driven data.** <https://bit.ly/2ZM8wZV>

**Cite this article as:** Bos LDJ, Sinha P, Dickson RP. The perils of premature phenotyping in COVID-19: a call for caution. *Eur Respir J* 2020; 56: 2001768 [<https://doi.org/10.1183/13993003.01768-2020>].

This single-page version can be shared freely online.

The severe acute respiratory syndrome coronavirus 2 poses an unprecedented global healthcare challenge. Severe coronavirus disease 2019 (COVID-19) pneumonia frequently causes hypoxaemic respiratory failure, manifesting in the acute respiratory distress syndrome (ARDS). Recently, authors have proposed distinct clinical phenotypes of COVID-19 pneumonia in several influential, high-profile essays [1–3]. For example, in a recent perspective in this journal [3], the authors speculated that COVID-19 has five phenotypic presentations: three phenotypes based on severity of hypoxaemia and need for supportive care (no hypoxaemia, mild hypoxaemia, and moderate hypoxaemia), and two phenotypes of severely hypoxaemic patients based on additional physiological and clinical features. Aligned with other recent efforts to phenotype COVID-19 patients [1, 2], the authors subtyped patients into a supposedly prevalent phenotype with normal compliance, low lung weight, and predominant perfusion abnormalities (“L” phenotype), and a less-prevalent phenotype with more typical features of ARDS, such as profound consolidation and low compliance (“H” phenotype). The authors advocate for distinct management strategies for these purported phenotypes, include permitting increased tidal volumes and restricted positive end-expiratory pressure in the “L” phenotype patients.
